# Supplementary material for: Zebrafish Patient-Derived Xenograft Model to Predict Treatment Outcomes of Colorectal Cancer Patients
Source: MDPI journal article supplement (doi:10.3390/biomedicines10071474), 2022-06-22
Supplement: s1 [file s1]

## Supplementary Methods

### *Demonstration that the xenografted tumor mass can be assimilated to a sphere.*

The demonstration of the tumor mass circularity is carried out acquiring confocal images of xenografted embryos 2 hpi. The embryos are anesthetized with MS 222 0.16 mg/mL, embedded in a drop of 3% methylcellulose and placed in lumox® dish.

Z-stacks are acquired both on ventral and lateral side for  $n \geq 4$  embryos from two independent experiment of colon cancer. Then the areas of the tumor from each side are respectively measured, obtaining a ratio of  $1.147 \pm 0.064$ .

### *Estimation of the radius at 2hpi and 2dpi*

Starting from zPDX area measured at 1dpi and 2dpi, we estimated radius as:

$$r = \sqrt{\frac{Area_{2hpi \text{ or } 2dpi}}{\pi}}$$

### *Apoptotic cells analysis*

zPDX were treated with 5-FU and FOLFOXIRI according to Section 2.4 of Materials & Methods and processed for immunofluorescence staining with rabbit anti-human Cleaved Caspase-3 and Hoechst as counterstaining. The quantification of apoptotic cells was performed manually using the Multi point Tool of ImageJ, counting the DiI/Cleaved Caspase double positive with respect to the total number of human cells (DiI-positive cells).

## Supplementary Figures

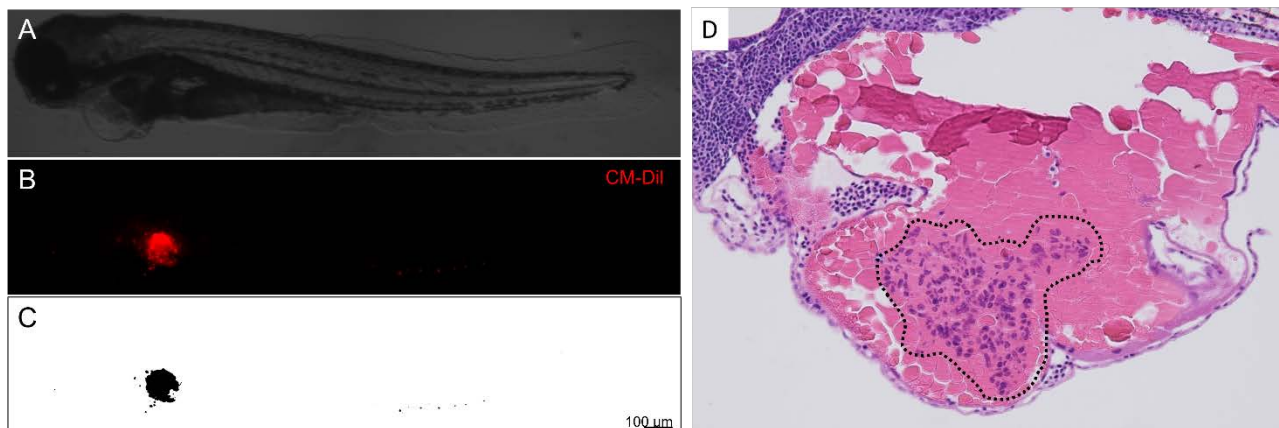

**Figure S1** - The tumor tissue is xenografted into the perivitelline space of a zebrafish at 2 dpf. Representative images of a zPDX 2 days post xenotransplantation. (A) Bright-field, (B) fluorescence image of human tumor tissue with cell membranes CM-DiI labeled, (C) 8-bit image converted by Image-J, used for the analysis of the tumor area. (D) Representative Hematoxylin & Eosin stained image of a zPDX with xenografted tumor cells (dashed area). Image acquired at 20x magnification.

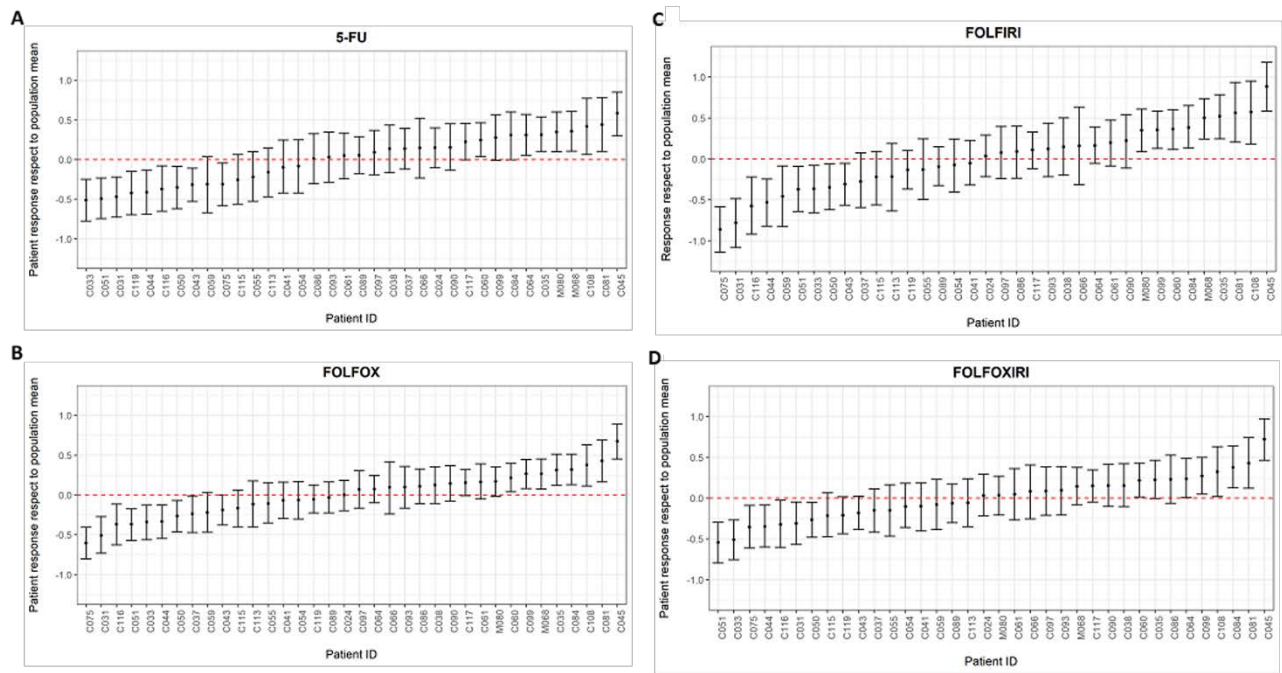

**Figure S2.** 95% CIs of the difference between fixed (treatments) and random coefficients (zPDXs) estimated by the LMM for 5-FU (A), FOLFOX (B), FOLFIRI (C) and FOLFOXIRI (D) chemotherapy treatments. The dots are the random effect, and the bars represent the 95% CIs of these values. The red dashed line is the mean response to each treatment of the zebrafish embryo populations.

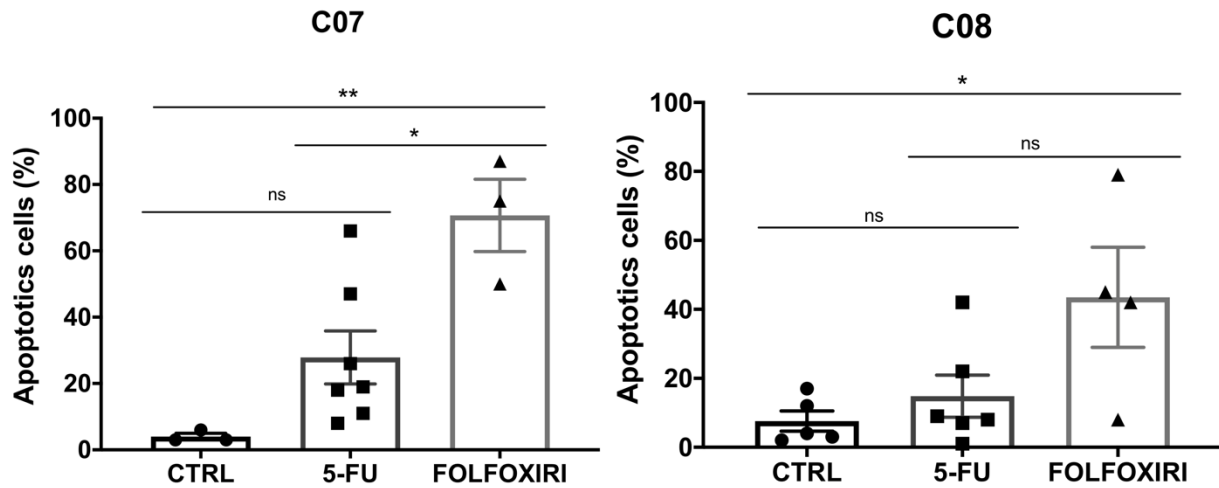

**Figure S3.** Percentage of human apoptotic cells in zPDX after 5-FU and FOLFOXIRI treatments. Data are expressed as mean  $\pm$  SEM,  $n \geq 3$  zPDX for each group. Statistical analysis was performed by Dunnett's multiple comparisons test. \* $p < 0.05$ , \*\* $p < 0.01$  and ns nonsignificant vs control. C07 and C08 are the patient's identification codes.

## Supplementary Table

Table S1. Fixed effects coefficients, their Standard Error (SE) and p-value estimated by LMM.

|                                        | Estimate | SE   | P-value               |
|----------------------------------------|----------|------|-----------------------|
| <b>Control</b>                         | 4.28     | 0.15 | $<2 \times 10^{-16}$  |
| <b>5-FU</b>                            | -0.19    | 0.06 | $4.67 \times 10^{-3}$ |
| <b>FOLFIRI</b>                         | -0.28    | 0.07 | $4.64 \times 10^{-4}$ |
| <b>FOLFOX</b>                          | -0.15    | 0.06 | $2.08 \times 10^{-2}$ |
| <b>FOLFOXIRI</b>                       | -0.25    | 0.06 | $2.80 \times 10^{-4}$ |
| <b>log<sub>10</sub>(r<sup>3</sup>)</b> | -0.40    | 0.03 | $<2 \times 10^{-16}$  |

## R packages

1. *car* package: John Fox and Sanford Weisberg (2019). An {R} Companion to Applied Regression. Third Edition. Thousand Oaks CA: Sage. URL: <https://socialsciences.mcmaster.ca/jfox/Books/Companion/>
2. *dplyr* package: Hadley Wickham, Romain François, Lionel Henry and Kirill Müller (2020). dplyr: A Grammar of Data Manipulation. R package version 1.0.1. <https://CRAN.R-project.org/package=dplyr>
3. *ggplot2* package: H. Wickham. ggplot2: Elegant Graphics for Data Analysis. Springer-Verlag New York. 2016.
4. *corrplot* package: Taiyun Wei and Viliam Simko (2017). R package "corrplot": Visualization of a Correlation Matrix (Version 0.84). Available from <https://github.com/taiyun/corrplot>
5. *reshape2* package: Hadley Wickham (2007). Reshaping Data with the reshape Package. Journal of Statistical Software. 21(12). 1-20. URL <http://www.jstatsoft.org/v21/i12/>.
6. *patchwork* package: Thomas Lin Pedersen (2020). patchwork: The Composer of Plots. R package version 1.1.0. <https://CRAN.R-project.org/package=patchwork>
7. *readxl* package: Hadley Wickham and Jennifer Bryan (2019). readxl: Read Excel Files. R package version 1.3.1. <https://CRAN.R-project.org/package=readxl>
8. *GGally* package: Barret Schloerke, Di Cook, Joseph Larmarange, Francois Briatte, Moritz Marbach, Edwin Thoen, Amos Elberg and Jason Crowley (2020). GGally: Extension to 'ggplot2'. R package version 2.0.0. <https://CRAN.R-project.org/package=GGally>
9. *broom* package: David Robinson, Alex Hayes and Simon Couch (2020). broom: Convert Statistical Objects into Tidy Tibbles. R package version 0.7.2. <https://CRAN.R-project.org/package=broom>
10. *parameters* package: Lüdtke D, Ben-Shachar M, Patil I, Makowski D (2020). "parameters: Extracting, Computing and Exploring the Parameters of Statistical Models using R." *Journal of Open Source Software*. \*5\*(53). 2445. doi: 10.21105/joss.02445 (URL: <https://doi.org/10.21105/joss.02445>).
11. *effects* package: John Fox and Sanford Weisberg (2019). An R Companion to Applied Regression. 3rd Edition. Thousand Oaks, CA <https://socialsciences.mcmaster.ca/jfox/Books/Companion/index.html>  
John Fox, Sanford Weisberg (2018). Visualizing Fit and Lack of Fit in Complex Regression Models with Predictor Effect Plots and Partial Residuals. Journal of Statistical Software. 87(9). 1-27. URL <https://www.jstatsoft.org/article/view/v087i09>.  
John Fox (2003). Effect Displays in R for Generalised Linear Models. Journal of Statistical Software. 8(15). 1-27. URL <https://www.jstatsoft.org/article/view/v008i15>.  
John Fox, Jangman Hong (2009). Effect Displays in R for Multinomial and Proportional-Odds Logit Models: Extensions to the effects Package. Journal of Statistical Software, 32(1), 1-24. URL <https://www.jstatsoft.org/article/view/v032i01>.
12. *ggeffects* package: Lüdtke D (2018). "ggeffects: Tidy Data Frames of Marginal Effects from Regression Models." *Journal of Open Source Software*. \*3\*(26). 772. doi: 10.21105/joss.00772 (URL: <https://doi.org/10.21105/joss.00772>).
13. *emmeans* package: Russell Lenth (2020). emmeans: Estimated Marginal Means, aka Least-Squares Means. R package version 1.5.2-1. <https://CRAN.R-project.org/package=emmeans>
14. *performance* package: Lüdtke, Makowski, Waggoner & Patil (2020). Assessment of Regression Models Performance. CRAN. Available from <https://easystats.github.io/performance/>
15. *lme4* package: Douglas Bates, Martin Maechler, Ben Bolker, Steve Walker (2015). Fitting Linear Mixed-Effects Models Using lme4. Journal of Statistical Software. 67(1). 1-48. doi:10.18637/jss.v067.i01.
16. *arm* package: Andrew Gelman and Yu-Sung Su (2020). arm: Data Analysis Using Regression and Multilevel/Hierarchical Models. R package version 1.11-2. <https://CRAN.R-project.org/package=arm>

17. *lmerTest* package: Kuznetsova A. Brockhoff PB. Christensen RHB (2017). "lmerTest Package: Tests in Linear Mixed Effects Models." *Journal of Statistical Software*. \*82\*(13). 1-26. doi: 10.18637/jss.v082.i13 (URL: <https://doi.org/10.18637/jss.v082.i13>)
18. *see* package: Lüdtke, Ben-Shachar. Waggoner & Makowski (2020). Visualisation Toolbox for 'easystats' and Extra Geoms. Themes and Color Palettes for 'ggplot2'. CRAN. Available from <https://easystats.github.io/see/>
19. *MuMIn* package: Kamil Barton (2020). MuMIn: Multi-Model Inference. R package version 1.43.17. <https://CRAN.R-project.org/package=MuMIn>
20. *factoextra* package: Alboukadel Kassambara and Fabian Mundt (2020). factoextra: Extract and Visualize the Results of Multivariate Data Analyses. R package version 1.0.7. <https://CRAN.R-project.org/package=factoextra>
21. *factoMineR* package: Sebastien Le. Julie Josse. Francois Husson (2008). FactoMineR: An R Package for Multivariate Analysis. *Journal of Statistical Software*. 25(1). 1-18. 10.18637/jss.v025.i01
22. *cluster* package: Maechler. M.. Rousseeuw. P.. Struyf. A.. Hubert. M.. Hornik. K.(2019). cluster: Cluster Analysis Basics and Extensions. R package version 2.1.0.
23. *stats* package: R Core Team (2020). R: A language and environment for statistical computing. R Foundation for Statistical Computing. Vienna. Austria. URL <https://www.R-project.org/>.
24. *merTools* package: Jared E. Knowles and Carl Frederick (2020). merTools: Tools for Analyzing Mixed Effect Regression Models. R package version 0.5.2. <https://CRAN.R-project.org/package=merTools>
25. *psych* package: Revelle. W. (2020) psych: Procedures for Personality and Psychological Research. Northwestern University. Evanston. Illinois. USA. <https://CRAN.R-project.org/package=psych> Version = 2.0.9..
26. *classInt* package: Roger Bivand (2020). classInt: Choose Univariate Class Intervals. R package version 0.4-3. <https://CRAN.R-project.org/package=classInt>
27. *dfidx* package: Yves Croissant (2020). dfidx: Indexed Data Frames. R package version 0.0-3. <https://CRAN.R-project.org/package=dfidx>
28. *forcats* package: Hadley Wickham (2020). forcats: Tools for Working with Categorical Variables (Factors). R package version 0.5.0. <https://CRAN.R-project.org/package=forcats>
30. *Kendall* package: A.I. McLeod (2011). Kendall: Kendall rank correlation and Mann-Kendall trend test. R package version 2.2. <https://CRAN.R-project.org/package=Kendall>
